# Supplementary material for: Patient-derived lymphoma spheroids integrating immune tumor microenvironment as preclinical follicular lymphoma models for personalized medicine
Source: PubMed Central journal article supplement — J Immunother Cancer. 2023 Oct 29;11(10):e007156. doi: 10.1136/jitc-2023-007156 (PMC10619028; doi:10.1136/jitc-2023-007156), 2023-10-29
Supplement: jitc-2023-007156supp002.pdf [file jitc-2023-007156supp002.pdf]

**Supplemental Figure 2: Bubble plot representing the most significant and representative GSEA pathways upregulated and downregulated in FL-PDLS compared to FL biopsies.**

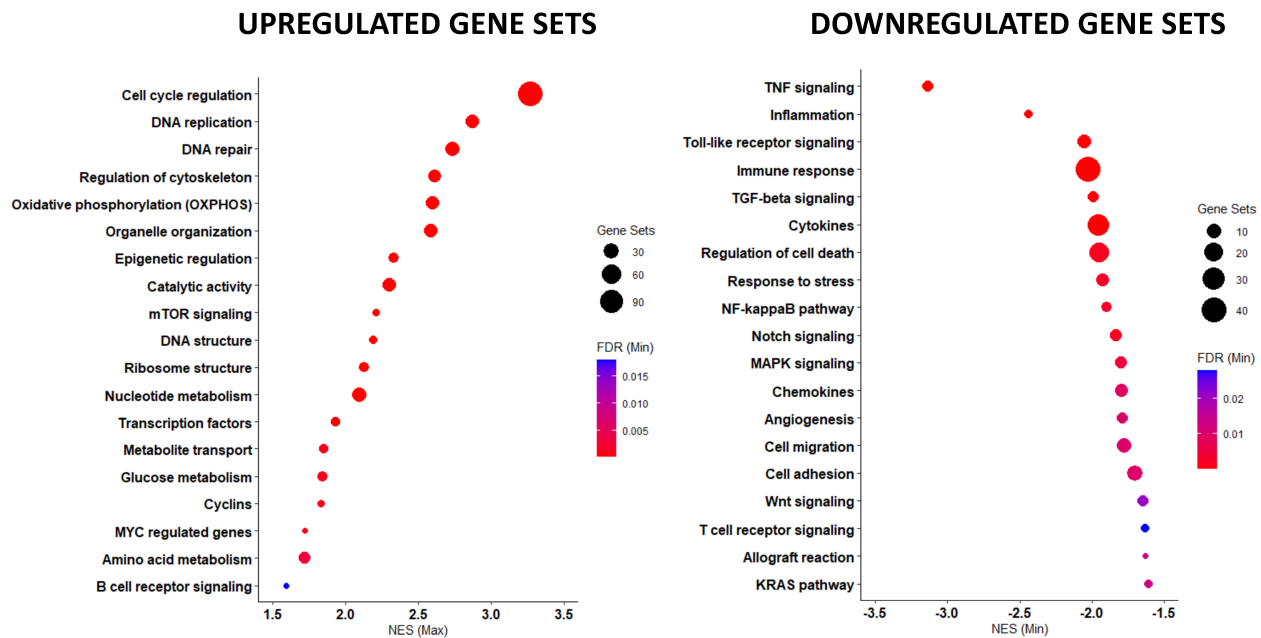

Bubble plot of significantly enriched pathways, grouped by biological process as in Table 1 and supp. Table 3. Different categories were ranked as enrichment score max or min of each gene sets (x-axis). Colors represent FDR. The size of the dots represents the number of Gene Sets related to each category.
