# Supplementary material for: Patient-derived lymphoma spheroids integrating immune tumor microenvironment as preclinical follicular lymphoma models for personalized medicine
Source: PubMed Central journal article supplement — J Immunother Cancer. 2023 Oct 29;11(10):e007156. doi: 10.1136/jitc-2023-007156 (PMC10619028; doi:10.1136/jitc-2023-007156), 2023-10-29
Supplement: jitc-2023-007156supp005.pdf [file jitc-2023-007156supp005.pdf]

**Supplementary Table 2: Primary antibodies, dye for viability and kit for cytokines used for flow cytometry analyses**

| Provider  | Antibody     | Chanel      | Clone       | Isotypes             |
|-----------|--------------|-------------|-------------|----------------------|
| BD        | CD19         | APC         | H1B19       | Mouse IgG1, κ        |
| BD        | CD10         | BV605       | HI10a       | Mouse BALB/c IgG1, κ |
| Biolegend | CD3          | APC-Fire    | UCHT1       | Mouse IgG1, κ        |
| BD        | CD4          | BUV395      | RPA-T4      | Mouse IgG1, κ        |
| BD        | CD8          | BV510       | RPA-T8      | Mouse IgG1, κ        |
| BD        | CD56         | PerCP-Cy5.5 | B159        | Mouse IgG1, κ        |
| BD        | Vδ2γ9        | FITC        | B3          | Mouse IgG1, κ        |
| BD        | CXCR5        | BV650       | Clone RF8B2 | Rat LOU              |
| BD        | CD25         | BV421       | M-A251      | Mouse BALB/c IgG1, κ |
| BD        | ICOS         | BV605       | DX29        | Mouse IgG1, κ        |
| BD        | CD39         | PE          | TU66        | Mouse IgG2b, κ       |
| BD        | CD73         | BUV737      | AD2         | Mouse IgG1, κ        |
| BD        | PD-1         | PE-Cy7      | EH12.1      | Mouse IgG1, κ        |
| BD        | PDL2         | BV650       | MIH18       | Mouse IgG1, κ        |
| BD        | 7-AAD        | PE-Cy5      |             |                      |
| BD        | CD107a       | PE          | H4A3        | Mouse BALB/c IgG1, κ |
| BD        | CD69         | APC         | FN50        | Mouse IgG1, κ        |
| BD        | IFN $\gamma$ | BV711       | B27         | Mouse IgG1, κ        |
| BD        | TNF $\alpha$ | PE-Cy7      | MAB11       | Mouse IgG1, κ        |
