# Supplementary material for: Patient-derived lymphoma spheroids integrating immune tumor microenvironment as preclinical follicular lymphoma models for personalized medicine
Source: PubMed Central journal article supplement — J Immunother Cancer. 2023 Oct 29;11(10):e007156. doi: 10.1136/jitc-2023-007156 (PMC10619028; doi:10.1136/jitc-2023-007156), 2023-10-29
Supplement: jitc-2023-007156supp006.pdf [file jitc-2023-007156supp006.pdf]

**Supplemental Table 3: Summary of gene sets overrepresented in FL-PDLS compared to 2D cultures**

| UPREGULATED GENE SETS              | Gene Sets | NES (Max) | FDR q-val (min) |
|------------------------------------|-----------|-----------|-----------------|
| <b>Proliferation</b>               |           |           |                 |
| Cell cycle regulation              | 114       | 3,27      | 0               |
| DNA replication                    | 21        | 2,87      | 0               |
| MYC regulated genes                | 1         | 1,72      | 0,001           |
| Transcription factors              | 5         | 1,93      | 0               |
| Cyclins                            | 2         | 1,83      | 0,001           |
| <b>Immune modulation</b>           |           |           |                 |
| B cell receptor signaling          | 1         | 1,59      | 0,018           |
| <b>Survival pathways</b>           |           |           |                 |
| DNA repair                         | 26        | 2,73      | 0               |
| mTOR signaling                     | 2         | 2,21      | 0               |
| <b>Cellular processes</b>          |           |           |                 |
| Regulation of cytoskeleton         | 17        | 2,61      | 0               |
| Epigenetic regulation              | 7         | 2,33      | 0               |
| Organelle organization             | 20        | 2,59      | 0               |
| <b>Metabolic pathways</b>          |           |           |                 |
| Oxidative phosphorylation (OXPHOS) | 19        | 2,6       | 0               |
| Nucleotide metabolism              | 25        | 2,09      | 0               |
| Amino acid metabolism              | 12        | 1,72      | 0,003           |
| Glucose metabolism                 | 7         | 1,84      | 0,001           |
| <b>Others</b>                      |           |           |                 |
| Ribosome structure                 | 8         | 2,13      | 0               |
| DNA structure                      | 3         | 2,19      | 0               |
| Metabolite transport               | 5         | 1,85      | 0,001           |
| Catalytic activity                 | 19        | 2,3       | 0               |

| DOWNREGULATED GENE SETS      | Gene Sets | NES (Min) | FDR q-val (min) |
|------------------------------|-----------|-----------|-----------------|
| <b>Proliferation</b>         |           |           |                 |
| MAPK signaling               | 5         | -1,8      | 0,005           |
| <b>Immune modulation</b>     |           |           |                 |
| Chemokines                   | 6         | -1,8      | 0,009           |
| Inflammation                 | 2         | -2,44     | 0               |
| Allograft reaction           | 1         | -1,63     | 0,012           |
| T cell receptor signaling    | 2         | -1,63     | 0,028           |
| Cytokines                    | 27        | -1,96     | 0               |
| Immune response              | 41        | -2,03     | 0               |
| <b>Survival pathways</b>     |           |           |                 |
| NF-kappaB pathway            | 3         | -1,9      | 0,003           |
| Notch signaling              | 5         | -1,83     | 0,002           |
| TNF signaling                | 4         | -3,14     | 0               |
| TGF-beta signaling           | 4         | -1,99     | 0               |
| Toll-like receptor signaling | 8         | -2,05     | 0               |
| KRAS pathway                 | 2         | -1,61     | 0,013           |
| Wnt signaling                | 4         | -1,65     | 0,021           |
| <b>Cellular processes</b>    |           |           |                 |
| Regulation of cell death     | 21        | -1,95     | 0,002           |
| Angiogenesis                 | 4         | -1,79     | 0,01            |
| Cell migration               | 9         | -1,78     | 0,01            |
| Cell adhesion                | 11        | -1,7      | 0,01            |
| Response to stress           | 6         | -1,93     | 0,003           |

GSEA was used to test for significant enrichment of defined gene signatures. NES indicates Normalized Enriched Score; FDR, False Discovery Rate. Threshold FDR<0.05 and NES>1.5. Custom genes set were experimentally derived and downloaded from <http://lymphochip.nih.gov/signaturedb/index.html>. C2CP, C5, C6 and H gene sets were obtained from the Molecular Signature Database (v2.5).
