# Supplementary material for: Patient-derived lymphoma spheroids integrating immune tumor microenvironment as preclinical follicular lymphoma models for personalized medicine
Source: PubMed Central journal article supplement — J Immunother Cancer. 2023 Oct 29;11(10):e007156. doi: 10.1136/jitc-2023-007156 (PMC10619028; doi:10.1136/jitc-2023-007156), 2023-10-29
Supplement: jitc-2023-007156supp007.pdf [file jitc-2023-007156supp007.pdf]

## 1 Supplemental Table 4: Complete GSEA results of PDLs vs 2D cultures analysis

2

| HALLMARKS (H)                      |                                    |      |       |           |
|------------------------------------|------------------------------------|------|-------|-----------|
| Biological process                 | GeneSet                            | SIZE | NES   | FDR q-val |
| Cell cycle regulation              | HALLMARK_E2F_TARGETS               | 200  | 3,27  | 0         |
|                                    | HALLMARK_G2M_CHECKPOINT            | 198  | 3,09  | 0         |
|                                    | HALLMARK_MITOTIC_SPINDLE           | 196  | 2,17  | 0         |
| Cytokines                          | HALLMARK_IL2_STAT5_SIGNALING       | 188  | -1,51 | 0,009     |
|                                    | HALLMARK_IL6_JAK_STAT3_SIGNALING   | 78   | -1,66 | 0,002     |
|                                    | HALLMARK_INTERFERON_ALPHA_RESPONSE | 97   | -1,76 | 0,001     |
|                                    | HALLMARK_INTERFERON_GAMMA_RESPONSE | 193  | -1,96 | 0         |
| DNA Repair                         | HALLMARK_DNA_REPAIR                | 147  | 1,93  | 0         |
| Inflammation                       | HALLMARK_INFLAMMATORY_RESPONSE     | 175  | -2,44 | 0         |
| mTOR Signaling                     | HALLMARK_MTORC1_SIGNALING          | 199  | 2,21  | 0         |
| MYC regulated genes                | HALLMARK_MYC_TARGETS_V1            | 200  | 1,72  | 0,001     |
| Oxidative phosphorylation (OXPHOS) | HALLMARK_OXIDATIVE_PHOSPHORYLATION | 200  | 2,49  | 0         |
| Regulation of cell death           | HALLMARK_APOPTOSIS                 | 149  | -1,45 | 0,015     |
| TGF-Beta signaling                 | HALLMARK_TGF_BETA_SIGNALING        | 53   | -1,79 | 0         |
| TNF Signaling                      | HALLMARK_TNFA_SIGNALING_VIA_NFKB   | 195  | -3,14 | 0         |

3  
4

| CANONICAL PATHWAYS (C2CP) |                                                            |      |       |           |
|---------------------------|------------------------------------------------------------|------|-------|-----------|
| Biological process        | GeneSet                                                    | SIZE | NES   | FDR q-val |
| Allograft reaction        | WP_ALLOGRAFT_REJECTION                                     | 74   | -1,63 | 0,012     |
| Amino acid metabolism     | REACTOME_METABOLISM_OF_AMINO_ACIDS_AND_DERIVATIVES         | 324  | 1,72  | 0,003     |
|                           | REACTOME_SELENOAMINO_ACID_METABOLISM                       | 112  | 1,71  | 0,004     |
|                           | WP_AMINO_ACID_METABOLISM                                   | 74   | 1,63  | 0,01      |
| Angiogenesis              | REACTOME_SIGNALING_BY_PDGF                                 | 53   | -1,62 | 0,024     |
| Cell adhesion             | KEGG_CELL_ADHESION_MOLECULES_CAMS                          | 108  | -1,68 | 0,01      |
| Cell cycle regulation     | KEGG_CELL_CYCLE                                            | 124  | 2,46  | 0         |
|                           | KEGG_OXIDATIVE_PHOSPHORYLATION                             | 116  | 2,39  | 0         |
|                           | KEGG_P53_SIGNALING_PATHWAY                                 | 66   | 1,61  | 0,011     |
|                           | PID_E2F_PATHWAY                                            | 70   | 2,37  | 0         |
|                           | PID_P73PATHWAY                                             | 72   | 1,73  | 0,015     |
|                           | PID_RB_1PATHWAY                                            | 57   | 1,65  | 0,023     |
|                           | REACTOME_APC_C_MEDIATED_DEGRADATION_OF_CELL_CYCLE_PROTEINS | 87   | 2,16  | 0         |
|                           | REACTOME_AURKA_ACTIVATION_BY_TPX2                          | 71   | 2,07  | 0         |
|                           | REACTOME_CELL_CYCLE                                        | 652  | 2,76  | 0         |
|                           | REACTOME_CELL_CYCLE_CHECKPOINTS                            | 277  | 2,86  | 0         |
|                           | REACTOME_CELL_CYCLE_MITOTIC                                | 525  | 2,75  | 0         |
|                           | REACTOME_CONDENSATION_OF_PROPHASE_CHROMOSOMES              | 50   | 2,22  | 0         |
|                           | REACTOME_G2_M_CHECKPOINTS                                  | 154  | 2,64  | 0         |
|                           | REACTOME_G2_M_DNA_DAMAGE_CHECKPOINT                        | 82   | 2,4   | 0         |
|                           | REACTOME_M_PHASE                                           | 383  | 2,51  | 0         |
|                           | REACTOME_MITOTIC_G1_PHASE_AND_G1_S_TRANSITION              | 148  | 2,46  | 0         |
|                           | REACTOME_MITOTIC_G2_G2_M_PHASES                            | 189  | 2,15  | 0         |
|                           | REACTOME_MITOTIC_METAPHASE_AND_ANAPHASE                    | 226  | 2,48  | 0         |

1

|                 |                                                                       |     |       |       |
|-----------------|-----------------------------------------------------------------------|-----|-------|-------|
|                 | REACTOME_MITOTIC_PROMETAPHASE                                         | 194 | 2,77  | 0     |
|                 | REACTOME_MITOTIC_PROPHASE                                             | 119 | 1,95  | 0     |
|                 | REACTOME_MITOTIC_SPINDLE_CHECKPOINT                                   | 110 | 2,75  | 0     |
|                 | REACTOME_PYRUVATE_METABOLISM_AND_CITRIC_ACID_TCA_CYCLE                | 51  | 1,78  | 0,002 |
|                 | REACTOME_RECRUITMENT_OF_MITOTIC_CENTROSOME_PROTEINS_AND_COMPLEXES     | 80  | 1,92  | 0     |
|                 | REACTOME_RECRUITMENT_OF_NUMA_TO_MITOTIC_CENTROSOMES                   | 87  | 1,85  | 0,001 |
|                 | REACTOME_REGULATION_OF_PLK1_ACTIVITY_AT_G2_M_TRANSITION               | 86  | 1,94  | 0     |
|                 | REACTOME_REGULATION_OF_TP53_ACTIVITY                                  | 157 | 1,94  | 0     |
|                 | REACTOME_REGULATION_OF_TP53_ACTIVITY_THROUGH_PHOSPHORYLATION          | 91  | 2,35  | 0     |
|                 | REACTOME_RHO_GTPASE_EFFECTORS                                         | 287 | 2,37  | 0     |
|                 | REACTOME_RHOD_GTPASE_CYCLE                                            | 50  | 1,48  | 0,04  |
|                 | REACTOME_RHOJ_GTPASE_CYCLE                                            | 51  | 1,43  | 0,061 |
|                 | REACTOME_S_PHASE                                                      | 161 | 2,57  | 0     |
|                 | REACTOME_TELOMERE_MAINTENANCE                                         | 95  | 2,24  | 0     |
|                 | REACTOME_THE_CITRIC_ACID_TCA_CYCLE_AND_RESPIRATORY_ELECTRON_TRANSPORT | 172 | 2,43  | 0     |
|                 | WP_CELL_CYCLE                                                         | 119 | 2,38  | 0     |
|                 | WP_G1_TO_S_CELL_CYCLE_CONTROL                                         | 62  | 2,43  | 0     |
|                 | WP_RETINOBLASTOMA_GENE_IN_CANCER                                      | 86  | 2,91  | 0     |
| Chemokines      | KEGG_CHEMOKINE_SIGNALING_PATHWAY                                      | 153 | -1,52 | 0,023 |
|                 | WP_CHEMOKINE_SIGNALING_PATHWAY                                        | 139 | -1,48 | 0,033 |
| Cyclins         | REACTOME_CYCLIN_A_CDK2_ASSOCIATED_EVENTS_AT_S_PHASE_ENTRY             | 84  | 1,54  | 0,022 |
| Cytokines       | KEGG_CYTOKINE_CYTOKINE_RECEPTOR_INTERACTION                           | 185 | -1,61 | 0,014 |
|                 | REACTOME_CYTOKINE_SIGNALING_IN_IMMUNE_SYSTEM                          | 634 | -1,47 | 0,068 |
|                 | REACTOME_DDX58_IFIH1_MEDIATED_INDUCION_OF_INTERFERON_ALPHA_BETA       | 67  | -1,57 | 0,031 |
|                 | REACTOME_INTERFERON_ALPHA_BETA_SIGNALING                              | 58  | -1,58 | 0,033 |
|                 | REACTOME_INTERLEUKIN_1_SIGNALING                                      | 111 | -1,47 | 0,069 |
|                 | REACTOME_INTERLEUKIN_4_AND_INTERLEUKIN_13_SIGNALING                   | 98  | -1,82 | 0,011 |
|                 | REACTOME_SIGNALING_BY_INTERLEUKINS                                    | 412 | -1,48 | 0,065 |
|                 | WP_IL1_SIGNALING_PATHWAY                                              | 52  | -1,72 | 0,005 |
|                 | WP_IL18_SIGNALING_PATHWAY                                             | 240 | -1,48 | 0,033 |
|                 | WP_IL4_SIGNALING_PATHWAY                                              | 53  | -1,44 | 0,042 |
| DNA Repair      | REACTOME_BASE_EXCISION_REPAIR                                         | 75  | 2,29  | 0     |
|                 | REACTOME_CHROMOSOME_MAINTENANCE                                       | 122 | 2,66  | 0     |
|                 | REACTOME_DNA_DOUBLE_STRAND_BREAK_REPAIR                               | 153 | 2,6   | 0     |
|                 | REACTOME_DNA_REPAIR                                                   | 312 | 2,44  | 0     |
|                 | REACTOME_GLOBAL_GENOME_NUCLEOTIDE_EXCISION_REPAIR_GG_NER              | 83  | 1,72  | 0,003 |
|                 | REACTOME_HOMOLOGY_DIRECTED_REPAIR                                     | 123 | 2,73  | 0     |
|                 | REACTOME_NUCLEOTIDE_EXCISION_REPAIR                                   | 109 | 1,68  | 0,005 |
|                 | REACTOME_PROCESSING_OF_DNA_DOUBLE_STRAND_BREAK_ENDS                   | 85  | 2,48  | 0     |
|                 | WP_DNA_DAMAGE_RESPONSE                                                | 68  | 2,01  | 0     |
|                 | WP_DNA_REPAIR_PATHWAYS_FULL_NETWORK                                   | 119 | 2,57  | 0     |
| DNA replication | REACTOME_DNA_REPLICATION                                              | 164 | 2,57  | 0     |
|                 | REACTOME_DNA_REPLICATION_PRE_INITIATION                               | 137 | 2,3   | 0     |
|                 | REACTOME_SEPARATION_OF_SISTER_CHROMATIDS                              | 181 | 2,62  | 0     |
|                 | REACTOME_SWITCHING_OF_ORIGINS_TO_A_POST_REPLICATIVE_STATE             | 91  | 2,16  | 0     |
|                 | REACTOME_SYNTHESIS_OF_DNA                                             | 120 | 2,64  | 0     |
| DNA structure   | REACTOME_COMPLEX_I_BIOGENESIS                                         | 57  | 1,9   | 0     |

|                                    |                                                                                                                           |     |       |       |
|------------------------------------|---------------------------------------------------------------------------------------------------------------------------|-----|-------|-------|
| Epigenetic regulation              | REACTOME_PRC2_METHYLATES_HISTONES_AND_DNA                                                                                 | 50  | 1,69  | 0,004 |
|                                    | REACTOME_RMTS_METHYLATE_HISTONE_ARGININES                                                                                 | 59  | 1,44  | 0,055 |
| Glucose metabolism                 | REACTOME_GLUCOSE_METABOLISM                                                                                               | 79  | 1,61  | 0,011 |
| Immune response                    | KEGG_NOD_LIKE_RECEPTOR_SIGNALING_PATHWAY                                                                                  | 50  | -1,97 | 0     |
|                                    | KEGG_RIG_I_LIKE_RECEPTOR_SIGNALING_PATHWAY                                                                                | 55  | -1,74 | 0,009 |
|                                    | KEGG_T_CELL_RECEPTOR_SIGNALING_PATHWAY                                                                                    | 103 | -1,5  | 0,024 |
|                                    | PID_CD8_TCR_DOWNSTREAM_PATHWAY                                                                                            | 54  | -1,61 | 0,032 |
|                                    | WP_TCELL_ACTIVATION_SARSCOV2                                                                                              | 83  | -1,77 | 0,003 |
|                                    | WP_TH17_CELL_DIFFERENTIATION_PATHWAY                                                                                      | 63  | -2,01 | 0     |
| MAPK signaling                     | KEGG_MAPK_SIGNALING_PATHWAY                                                                                               | 214 | -1,8  | 0,007 |
|                                    | WP_MAPK_SIGNALING_PATHWAY                                                                                                 | 202 | -1,69 | 0,005 |
| Metabolite transport               | REACTOME_GOLGI_TO_ER_RETROGRADE_TRANSPORT                                                                                 | 119 | 1,78  | 0,002 |
| Notch signaling                    | REACTOME_SIGNALING_BY_NOTCH1                                                                                              | 69  | -1,78 | 0,005 |
|                                    | REACTOME_SIGNALING_BY_NOTCH1_PEST_DOMAIN_MUTANTS_IN_CANCER                                                                | 55  | -1,79 | 0,007 |
|                                    | WP_NOTCH_SIGNALING_PATHWAY                                                                                                | 57  | -1,83 | 0,002 |
| Nucleotide metabolism              | KEGG_PURINE_METABOLISM                                                                                                    | 139 | 1,58  | 0,015 |
|                                    | KEGG_PYRIMIDINE_METABOLISM                                                                                                | 92  | 1,97  | 0     |
|                                    | REACTOME_METABOLISM_OF_NUCLEOTIDES                                                                                        | 90  | 1,63  | 0,009 |
|                                    | WP_PYRIMIDINE_METABOLISM                                                                                                  | 81  | 1,89  | 0     |
| Organelle organization             | REACTOME_MITOCHONDRIAL_TRANSLATION                                                                                        | 96  | 1,92  | 0     |
|                                    | REACTOME_ORGANELLE_BIOGENESIS_AND_MAINTENANCE                                                                             | 277 | 1,5   | 0,031 |
| Oxidative phosphorylation (OXPHOS) | REACTOME_RESPIRATORY_ELECTRON_TRANSPORT                                                                                   | 102 | 2,37  | 0     |
|                                    | REACTOME_RESPIRATORY_ELECTRON_TRANSPORT_ATP_SYNTHESIS_BY_CHEMIOSMOTIC_COUPLING_AND_HEAT_PRODUCTION_BY_UNCOUPLING_PROTEINS | 125 | 2,53  | 0     |
|                                    | WP_ELECTRON_TRANSPORT_CHAIN_OXPHOS_SYSTEM_IN_MITOCHONDRIA                                                                 | 100 | 2,6   | 0     |
|                                    | WP_MITOCHONDRIAL_COMPLEX_I_ASSEMBLY_MODEL_OXPHOS_SYSTEM                                                                   | 56  | 1,95  | 0     |
|                                    | WP_OXIDATIVE_PHOSPHORYLATION                                                                                              | 59  | 2,15  | 0     |
| Regulation of cell death           | KEGG_APOPTOSIS                                                                                                            | 81  | -1,62 | 0,016 |
|                                    | REACTOME_DEATH_RECEPTOR_SIGNALLING                                                                                        | 130 | -1,42 | 0,094 |
|                                    | WP_APOPTOSIS                                                                                                              | 81  | -1,56 | 0,021 |
|                                    | WP_APOPTOSIS_MODULATION_AND_SIGNALING                                                                                     | 84  | -1,59 | 0,016 |
| T cell receptor signaling          | WP_TCELL_RECEPTOR_SIGNALING_PATHWAY                                                                                       | 88  | -1,44 | 0,043 |
| TGF-Beta signaling                 | KEGG_TGF_BETA_SIGNALING_PATHWAY                                                                                           | 74  | -1,55 | 0,018 |
|                                    | REACTOME_SIGNALING_BY_TGFB_FAMILY_MEMBERS                                                                                 | 113 | -1,57 | 0,031 |
| TNF Signaling                      | WP_TNFALPHA_SIGNALING_PATHWAY                                                                                             | 87  | -2,02 | 0     |
| Toll-like Receptor Signaling       | KEGG_TOLL_LIKE_RECEPTOR_SIGNALING_PATHWAY                                                                                 | 85  | -1,99 | 0     |
|                                    | REACTOME_MYD88_INDEPENDENT_TLR4_CASCADE                                                                                   | 105 | -1,68 | 0,013 |
|                                    | REACTOME_TOLL_LIKE_RECEPTOR_9_TLR9_CASCADE                                                                                | 102 | -1,46 | 0,066 |
|                                    | REACTOME_TOLL_LIKE_RECEPTOR_CASCADES                                                                                      | 154 | -1,46 | 0,067 |
|                                    | REACTOME_TOLL_LIKE_RECEPTOR_TLR1_TLR2_CASCADE                                                                             | 108 | -1,54 | 0,04  |
|                                    | WP_TOLLLIKE_RECEPTOR_SIGNALING_PATHWAY                                                                                    | 86  | -2,03 | 0     |
| Transcription Factors              | REACTOME_RNA_POLYMERASE_I_TRANSCRIPTION                                                                                   | 87  | 1,44  | 0,056 |
|                                    | REACTOME_TP53_REGULATES_TRANSCRIPTION_OF_DNA_REPAIR_GENES                                                                 | 60  | 1,55  | 0,02  |
|                                    | REACTOME_TRANSCRIPTION_COUPLED_NUCLEOTIDE_EXCISION_REPAIR_TRANSACTION                                                     | 77  | 1,9   | 0     |
|                                    | REACTOME_TRANSCRIPTIONAL_REGULATION_BY_SMALL_RNAS                                                                         | 84  | 1,6   | 0,012 |
|                                    | REACTOME_TRANSCRIPTIONAL_REGULATION_BY_TP53                                                                               | 355 | 1,93  | 0     |
| Wnt signaling                      | PID_BETA_CATENIN_NUC_PATHWAY                                                                                              | 66  | -1,65 | 0,024 |

5

| GO GENESETS (C5)          |                                                                                                               |      |       |           |
|---------------------------|---------------------------------------------------------------------------------------------------------------|------|-------|-----------|
| Biological process        | GeneSet                                                                                                       | SIZE | NES   | FDR q-val |
| Amino acid metabolism     | GOBP_CELLULAR_MODIFIED_AMINO_ACID_METABOLIC_PROCESS                                                           | 135  | 1,72  | 0,005     |
|                           | GOBP_ALPHA_AMINO_ACID_CATABOLIC_PROCESS                                                                       | 68   | 1,69  | 0,006     |
|                           | GOBP_CELLULAR_AMINO_ACID_CATABOLIC_PROCESS                                                                    | 84   | 1,69  | 0,006     |
|                           | GOBP_ORGANIC_ACID_METABOLIC_PROCESS                                                                           | 764  | 1,62  | 0,013     |
|                           | GOBP_ORGANIC_ACID_BIOSYNTHETIC_PROCESS                                                                        | 250  | 1,61  | 0,014     |
|                           | GOBP_ALPHA_AMINO_ACID_METABOLIC_PROCESS                                                                       | 167  | 1,6   | 0,016     |
|                           | GOBP_CELLULAR_AMINO_ACID_METABOLIC_PROCESS                                                                    | 247  | 1,57  | 0,022     |
|                           | GOBP_MONOCARBOXYLIC_ACID_METABOLIC_PROCESS                                                                    | 468  | 1,56  | 0,023     |
|                           | GOBP_CELLULAR_AMINO_ACID_BIOSYNTHETIC_PROCESS                                                                 | 68   | 1,53  | 0,029     |
| Angiogenesis              | GOBP_VASCULATURE_DEVELOPMENT                                                                                  | 595  | -1,53 | 0,049     |
|                           | GOBP_REGULATION_OF_VASCULATURE_DEVELOPMENT                                                                    | 230  | -1,54 | 0,045     |
|                           | GOBP_VASCULOGENESIS                                                                                           | 58   | -1,79 | 0,01      |
| B cell receptor signaling | GOBP_B_CELL_RECEPTOR_SIGNALING_PATHWAY                                                                        | 72   | 1,59  | 0,018     |
| Catalytic activity        | GOMF_CATALYTIC_ACTIVITY_ACTING_ON_DNA                                                                         | 226  | 2,3   | 0         |
|                           | GOMF_DEOXYRIBONUCLEASE_ACTIVITY                                                                               | 55   | 2,22  | 0         |
|                           | GOMF_EXONUCLEASE_ACTIVITY_ACTIVE_WITH_EITHER_RIBO_OR_DEOXYRIBONUCLEIC_ACIDS_AND_PRODUCING_5_PHOSPHOMONOESTERS | 57   | 1,88  | 0,001     |
|                           | GOMF_EXONUCLEASE_ACTIVITY                                                                                     | 81   | 1,8   | 0,002     |
|                           | GOMF_OXIDOREDUCTASE_ACTIVITY_ACTING_ON_NAD_P_H                                                                | 82   | 1,73  | 0,004     |
|                           | GOMF_NUCLEASE_ACTIVITY                                                                                        | 191  | 1,73  | 0,004     |
|                           | GOMF_OXIDOREDUCTASE_ACTIVITY                                                                                  | 602  | 1,69  | 0,007     |
|                           | GOMF_KINASE_REGULATOR_ACTIVITY                                                                                | 216  | 1,68  | 0,007     |
|                           | GOBP_REGULATION_OF_UBIQUITIN_PROTEIN_TRANSFERASE_ACTIVITY                                                     | 53   | 1,65  | 0,01      |
|                           | GOMF_ENDONUCLEASE_ACTIVITY                                                                                    | 109  | 1,62  | 0,013     |
|                           | GOMF_HELICASE_ACTIVITY                                                                                        | 152  | 1,62  | 0,014     |
|                           | GOMF_LIGASE_ACTIVITY                                                                                          | 160  | 1,6   | 0,016     |
|                           | GOMF_OXIDOREDUCTASE_ACTIVITY_ACTING_ON_THE_CH_CH_GROUP_OF_DONORS                                              | 57   | 1,58  | 0,019     |
|                           | GOMF_ATP_DEPENDENT_ACTIVITY                                                                                   | 501  | 1,57  | 0,021     |
|                           | GOMF_HYDRO_LYASE_ACTIVITY                                                                                     | 55   | 1,54  | 0,028     |
|                           | GOMF_HYDROLASE_ACTIVITY_ACTING_ON_CARBON_NITROGEN_BUT_NOT_PEPTIDE_BONDS                                       | 111  | 1,52  | 0,032     |
|                           | GOMF_KINASE_ACTIVATOR_ACTIVITY                                                                                | 101  | 1,52  | 0,032     |
|                           | GOMF_ATP_HYDROLYSIS_ACTIVITY                                                                                  | 323  | 1,52  | 0,034     |
|                           | GOMF_CATALYTIC_ACTIVITY_ACTING_ON_A_NUCLEIC_ACID                                                              | 568  | 1,48  | 0,046     |
| Cell adhesion             | GOBP_CELL_CELL_ADHESION                                                                                       | 732  | -1,48 | 0,06      |
|                           | GOBP_REGULATION_OF_CELL_ADHESION                                                                              | 658  | -1,57 | 0,039     |
|                           | GOBP_NEGATIVE_REGULATION_OF_CELL_ADHESION                                                                     | 234  | -1,57 | 0,039     |
|                           | GOBP_POSITIVE_REGULATION_OF_CELL_ADHESION                                                                     | 409  | -1,58 | 0,036     |
|                           | GOBP_NEGATIVE_REGULATION_OF_LEUKOCYTE_CELL_CELL_ADHESION                                                      | 110  | -1,59 | 0,034     |
|                           | GOBP_LEUKOCYTE_CELL_CELL_ADHESION                                                                             | 350  | -1,6  | 0,032     |
|                           | GOBP_NEGATIVE_REGULATION_OF_CELL_CELL_ADHESION                                                                | 153  | -1,62 | 0,028     |
|                           | GOBP_POSITIVE_REGULATION_OF_CELL_CELL_ADHESION                                                                | 279  | -1,62 | 0,029     |
|                           | GOBP_POSITIVE_REGULATION_OF_LEUKOCYTE_CELL_CELL_ADHESION                                                      | 244  | -1,63 | 0,027     |
|                           | GOBP_REGULATION_OF_CELL_CELL_ADHESION                                                                         | 405  | -1,7  | 0,019     |
| Cell cycle regulation     | GOBP_MITOTIC_CELL_CYCLE_CHECKPOINT_SIGNALING                                                                  | 139  | 2,84  | 0         |

4

|                                                                 |     |      |   |
|-----------------------------------------------------------------|-----|------|---|
| GOBP_CELL_CYCLE_CHECKPOINT_SIGNALING                            | 184 | 2,77 | 0 |
| GOCC_CONDENSED_CHROMOSOME_CENTROMERIC_REGION                    | 169 | 2,73 | 0 |
| GOBP_METAPHASE_ANAPHASE_TRANSITION_OF_CELL_CYCLE                | 93  | 2,71 | 0 |
| GOBP_MITOTIC_NUCLEAR_DIVISION                                   | 309 | 2,71 | 0 |
| GOBP_NEGATIVE_REGULATION_OF_NUCLEAR_DIVISION                    | 61  | 2,68 | 0 |
| GOBP_REGULATION_OF_MITOTIC_NUCLEAR_DIVISION                     | 108 | 2,67 | 0 |
| GOCC_CHROMOSOME_CENTROMERIC_REGION                              | 240 | 2,66 | 0 |
| GOCC_CHROMOSOMAL_REGION                                         | 366 | 2,65 | 0 |
| GOBP_MITOTIC_SPINDLE_ORGANIZATION                               | 128 | 2,65 | 0 |
| GOBP_NEGATIVE_REGULATION_OF_CHROMOSOME_ORGANIZATION             | 91  | 2,6  | 0 |
| GOBP_MITOTIC_CELL_CYCLE_PROCESS                                 | 718 | 2,56 | 0 |
| GOBP_SPINDLE_ORGANIZATION                                       | 188 | 2,56 | 0 |
| GOBP_REGULATION_OF_NUCLEAR_DIVISION                             | 128 | 2,56 | 0 |
| GOBP_CHROMOSOME_ORGANIZATION                                    | 562 | 2,55 | 0 |
| GOCC_NUCLEAR_CHROMOSOME                                         | 229 | 2,52 | 0 |
| GOBP_CELL_DIVISION                                              | 579 | 2,5  | 0 |
| GOBP_NEGATIVE_REGULATION_OF_CELL_CYCLE_PROCESS                  | 286 | 2,48 | 0 |
| GOBP_MITOTIC_CELL_CYCLE                                         | 855 | 2,46 | 0 |
| GOBP_MEIOSIS_I_CELL_CYCLE_PROCESS                               | 110 | 2,46 | 0 |
| GOBP_SPINDLE_ASSEMBLY                                           | 126 | 2,46 | 0 |
| GOBP_HOMOLOGOUS_RECOMBINATION                                   | 55  | 2,44 | 0 |
| GOBP_MEIOTIC_CELL_CYCLE                                         | 240 | 2,43 | 0 |
| GOBP_NEGATIVE_REGULATION_OF_MITOTIC_CELL_CYCLE                  | 218 | 2,43 | 0 |
| GOBP_METAPHASE_PLATE_CONGRESSION                                | 70  | 2,42 | 0 |
| GOBP_MITOTIC_DNA_INTEGRITY_CHECKPOINT_SIGNALING                 | 83  | 2,42 | 0 |
| GOBP_POSITIVE_REGULATION_OF_CELL_CYCLE_PROCESS                  | 219 | 2,41 | 0 |
| GOBP_REGULATION_OF_CELL_CYCLE_PHASE_TRANSITION                  | 403 | 2,4  | 0 |
| GOBP_NEGATIVE_REGULATION_OF_MITOTIC_CELL_CYCLE_PHASE_TRANSITION | 171 | 2,4  | 0 |
| GOBP_DNA_RECOMBINATION                                          | 298 | 2,38 | 0 |
| GOCC_CONDENSED_NUCLEAR_CHROMOSOME                               | 70  | 2,38 | 0 |
| GOBP_DNA_INTEGRITY_CHECKPOINT_SIGNALING                         | 127 | 2,38 | 0 |
| GOBP_REGULATION_OF_CHROMOSOME_ORGANIZATION                      | 242 | 2,38 | 0 |
| GOBP_REGULATION_OF_CELL_CYCLE_PROCESS                           | 646 | 2,37 | 0 |
| GOBP_CELL_CYCLE_G2_M_PHASE_TRANSITION                           | 148 | 2,37 | 0 |
| GOBP_CELL_CYCLE_PHASE_TRANSITION                                | 515 | 2,37 | 0 |
| GOBP_REGULATION_OF_MITOTIC_CELL_CYCLE_PHASE_TRANSITION          | 314 | 2,37 | 0 |
| GOBP_MITOTIC_METAPHASE_PLATE_CONGRESSION                        | 57  | 2,35 | 0 |
| GOBP_REGULATION_OF_CELL_CYCLE_G2_M_PHASE_TRANSITION             | 106 | 2,35 | 0 |
| GOBP_CHROMOSOME_ORGANIZATION_INVOLVED_IN_MEIOTIC_CELL_CYCLE     | 63  | 2,35 | 0 |
| GOBP_MITOTIC_CELL_CYCLE_PHASE_TRANSITION                        | 422 | 2,34 | 0 |
| GOBP_NEGATIVE_REGULATION_OF_CELL_CYCLE                          | 358 | 2,3  | 0 |
| GOMF_DNA_HELICASE_ACTIVITY                                      | 70  | 2,3  | 0 |
| GOBP_REGULATION_OF_MITOTIC_CELL_CYCLE                           | 459 | 2,29 | 0 |
| GOBP_MITOTIC_G2_M_TRANSITION_CHECKPOINT                         | 50  | 2,26 | 0 |
| GOCC_SPINDLE_MICROTUBULE                                        | 83  | 2,26 | 0 |
| GOBP_MITOTIC_SPINDLE_ASSEMBLY                                   | 73  | 2,25 | 0 |
| GOCC_SPINDLE                                                    | 399 | 2,24 | 0 |

|                |                                                                             |     |       |       |
|----------------|-----------------------------------------------------------------------------|-----|-------|-------|
|                | GOMF_ATP_DEPENDENT_ACTIVITY_ACTING_ON_DNA                                   | 114 | 2,24  | 0     |
|                | GOCC_SPINDLE_POLE                                                           | 162 | 2,23  | 0     |
|                | GOBP_POSITIVE_REGULATION_OF_MITOTIC_CELL_CYCLE_PHASE_TRANSITION             | 85  | 2,22  | 0     |
|                | GOCC_MITOTIC_SPINDLE                                                        | 172 | 2,22  | 0     |
|                | GOBP_POSITIVE_REGULATION_OF_CELL_CYCLE_PHASE_TRANSITION                     | 103 | 2,21  | 0     |
|                | GOBP_POSITIVE_REGULATION_OF_CELL_CYCLE                                      | 291 | 2,15  | 0     |
|                | GOBP_MITOTIC_CYTOKINESIS                                                    | 81  | 2,13  | 0     |
|                | GOBP_REGULATION_OF_CYTOKINESIS                                              | 82  | 2,12  | 0     |
|                | GOBP_NEGATIVE_REGULATION_OF_CELL_CYCLE_G2_M_PHASE_TRANSITION                | 63  | 2,11  | 0     |
|                | GOBP_REGULATION_OF_CELL_CYCLE                                               | 990 | 2     | 0     |
|                | GOBP_HOMOLOGOUS_CHROMOSOME_SEGREGATION                                      | 51  | 1,98  | 0     |
|                | GOBP_CYTOKINESIS                                                            | 167 | 1,98  | 0     |
|                | GOBP_REGULATION_OF_CELL_DIVISION                                            | 152 | 1,95  | 0     |
|                | GOBP_CYTOSKELETON_DEPENDENT_CYTOKINESIS                                     | 105 | 1,94  | 0     |
|                | GOBP_CENTROSOME_DUPLICATION                                                 | 70  | 1,92  | 0     |
|                | GOBP_POSITIVE_REGULATION_OF_MITOTIC_CELL_CYCLE                              | 111 | 1,9   | 0     |
|                | GOBP_REGULATION_OF_CENTROSOME_CYCLE                                         | 51  | 1,79  | 0,002 |
|                | GOBP_REGULATION_OF_MEIOTIC_CELL_CYCLE                                       | 53  | 1,76  | 0,003 |
|                | GOBP_POSITIVE_REGULATION_OF_CELL_DIVISION                                   | 65  | 1,7   | 0,006 |
|                | GOBP_POSITIVE_REGULATION_OF_CELL_CYCLE_G1_S_PHASE_TRANSITION                | 52  | 1,61  | 0,015 |
|                | GOBP_CELL_CYCLE_G1_S_PHASE_TRANSITION                                       | 234 | 1,61  | 0,015 |
|                | GOBP_REGULATION_OF_CELL_CYCLE_G1_S_PHASE_TRANSITION                         | 172 | 1,51  | 0,036 |
| Cell Migration | GOBP_REGULATION_OF_BLOOD_VESSEL_ENDOTHELIAL_CELL_MIGRATION                  | 76  | -1,56 | 0,041 |
|                | GOBP_BLOOD_VESSEL_ENDOTHELIAL_CELL_MIGRATION                                | 100 | -1,57 | 0,037 |
|                | GOBP_NEUTROPHIL_MIGRATION                                                   | 101 | -1,6  | 0,032 |
|                | GOBP_AMEBOIDAL_TYPE_CELL_MIGRATION                                          | 354 | -1,62 | 0,03  |
|                | GOBP_NEGATIVE_REGULATION_OF_EPITHELIAL_CELL_MIGRATION                       | 53  | -1,64 | 0,027 |
|                | GOBP_ENDOTHELIAL_CELL_MIGRATION                                             | 183 | -1,67 | 0,022 |
|                | GOBP GRANULOCYTE MIGRATION                                                  | 120 | -1,68 | 0,022 |
|                | GOBP_REGULATION_OF_ENDOTHELIAL_CELL_MIGRATION                               | 138 | -1,73 | 0,016 |
| Chemokines     | GOBP_REGULATION_OF_EPITHELIAL_CELL_MIGRATION                                | 190 | -1,78 | 0,01  |
|                | GOBP GRANULOCYTE CHEMOTAXIS                                                 | 99  | -1,53 | 0,048 |
|                | GOBP_NEUTROPHIL_CHEMOTAXIS                                                  | 82  | -1,55 | 0,045 |
|                | GOBP_RESPONSE_TO_CHEMOKINE                                                  | 67  | -1,78 | 0,01  |
| Cyclins        | GOBP_CELLULAR_RESPONSE_TO_INTERLEUKIN_1                                     | 85  | -1,8  | 0,009 |
|                | GOBP_REGULATION_OF_CYCLIN_DEPENDENT_PROTEIN_KINASE_ACTIVITY                 | 92  | 1,83  | 0,001 |
| Cytokines      | GOBP_NEGATIVE_REGULATION_OF_CYTOKINE_PRODUCTION                             | 225 | -1,5  | 0,057 |
|                | GOBP_INTERLEUKIN_2_PRODUCTION                                               | 56  | -1,53 | 0,048 |
|                | GOBP_NEGATIVE_REGULATION_OF_RESPONSE_TO_CYTOKINE_STIMULUS                   | 62  | -1,55 | 0,045 |
|                | GOBP_REGULATION_OF_RESPONSE_TO_CYTOKINE_STIMULUS                            | 136 | -1,56 | 0,039 |
|                | GOBP_CYTOKINE_PRODUCTION                                                    | 616 | -1,62 | 0,029 |
|                | GOBP_CYTOKINE_PRODUCTION_INVOLVED_IN_IMMUNE_RESPONSE                        | 104 | -1,65 | 0,025 |
|                | GOBP_RESPONSE_TO_CYTOKINE                                                   | 743 | -1,65 | 0,025 |
|                | GOBP_POSITIVE_REGULATION_OF_CYTOKINE_PRODUCTION_INVOLVED_IN_IMMUNE_RESPONSE | 75  | -1,65 | 0,025 |
|                | GOBP_POSITIVE_REGULATION_OF_CYTOKINE_PRODUCTION                             | 398 | -1,69 | 0,021 |
|                | GOBP_RESPONSE_TO_INTERLEUKIN_1                                              | 108 | -1,7  | 0,019 |
|                | GOBP_INTERLEUKIN_12_PRODUCTION                                              | 58  | -1,77 | 0,011 |

|                                      |                                                                            |      |       |       |
|--------------------------------------|----------------------------------------------------------------------------|------|-------|-------|
|                                      | GOBP_CYTOKINE_MEDIATED_SIGNALING_PATHWAY                                   | 373  | -1,88 | 0,004 |
| DNA Repair                           | GOBP_RECOMBINATIONAL_REPAIR                                                | 166  | 2,5   | 0     |
|                                      | GOBP_DOUBLE_STRAND_BREAK_REPAIR                                            | 287  | 2,37  | 0     |
|                                      | GOBP_DNA_REPAIR                                                            | 557  | 2,31  | 0     |
|                                      | GOMF_DAMAGED_DNA_BINDING                                                   | 72   | 2,25  | 0     |
|                                      | GOMF_SINGLE_STRANDED_DNA_BINDING                                           | 121  | 2,2   | 0     |
|                                      | GOBP_CELLULAR_RESPONSE_TO_DNA_DAMAGE_STIMULUS                              | 827  | 2,01  | 0     |
|                                      | GOCC_SITE_OF_DNA_DAMAGE                                                    | 105  | 1,96  | 0     |
|                                      | GOBP_SIGNAL_TRANSDUCTION_IN_RESPONSE_TO_DNA_DAMAGE                         | 175  | 1,91  | 0     |
|                                      | GOBP_REGULATION_OF_DOUBLE_STRAND_BREAK_REPAIR_VIA_HOMOLOGOUS_RECOMBINATION | 70   | 1,73  | 0,004 |
|                                      | GOBP_REGULATION_OF_DNA_REPAIR                                              | 206  | 1,71  | 0,005 |
|                                      | GOBP_REGULATION_OF_DOUBLE_STRAND_BREAK_REPAIR                              | 131  | 1,66  | 0,01  |
|                                      | GOBP_REGULATION_OF_RESPONSE_TO_DNA_DAMAGE_STIMULUS                         | 302  | 1,63  | 0,012 |
|                                      | GOBP_DOUBLE_STRAND_BREAK_REPAIR_VIA_NONHOMOLOGOUS_END_JOINING              | 70   | 1,54  | 0,028 |
|                                      | GOBP_RESPONSE_TO_UV                                                        | 139  | 1,51  | 0,037 |
|                                      | GOBP_POSITIVE_REGULATION_OF_DNA_REPAIR                                     | 124  | 1,48  | 0,046 |
| DNA replication                      | GOBP_CHROMOSOME_SEPARATION                                                 | 125  | 2,87  | 0     |
|                                      | GOBP_REGULATION_OF_CHROMOSOME_SEPARATION                                   | 105  | 2,86  | 0     |
|                                      | GOBP_SISTER_CHROMATID_SEGREGATION                                          | 226  | 2,86  | 0     |
|                                      | GOBP_DNA_TEMPLATED_DNA_REPLICATION                                         | 163  | 2,85  | 0     |
|                                      | GOBP_REGULATION_OF_CHROMOSOME_SEGREGATION                                  | 122  | 2,85  | 0     |
|                                      | GOBP_CHROMOSOME_SEGREGATION                                                | 352  | 2,84  | 0     |
|                                      | GOCC_CONDENSED_CHROMOSOME                                                  | 259  | 2,8   | 0     |
|                                      | GOBP_NUCLEAR_CHROMOSOME_SEGREGATION                                        | 293  | 2,78  | 0     |
|                                      | GOBP_REGULATION_OF_DNA_TEMPLATED_DNA_REPLICATION                           | 57   | 2,74  | 0     |
|                                      | GOBP_REGULATION_OF_MITOTIC_SISTER_CHROMATID_SEGREGATION                    | 54   | 2,74  | 0     |
|                                      | GOBP_DNA_REPLICATION                                                       | 277  | 2,65  | 0     |
|                                      | GOCC_REPLICATION_FORK                                                      | 65   | 2,59  | 0     |
|                                      | GOBP_DNA_TEMPLATED_DNA_REPLICATION_MAINTENANCE_OF_FIDELITY                 | 54   | 2,59  | 0     |
|                                      | GOBP_REGULATION_OF_DNA_REPLICATION                                         | 131  | 2,39  | 0     |
|                                      | GOBP_DNA_CONFORMATION_CHANGE                                               | 102  | 2,38  | 0     |
| GOBP_REGULATION_OF_DNA_RECOMBINATION | 123                                                                        | 1,56 | 0,022 |       |
| DNA structure                        | GOCC_DNA_PACKAGING_COMPLEX                                                 | 129  | 2,19  | 0     |
|                                      | GOBP_PROTEIN_DNA_COMPLEX_SUBUNIT_ORGANIZATION                              | 222  | 2,08  | 0     |
| Epigenetic regulation                | GOCC_NUCLEOSOME                                                            | 87   | 1,64  | 0,011 |
|                                      | GOBP_NUCLEOSOME_ASSEMBLY                                                   | 80   | 1,62  | 0,014 |
|                                      | GOBP_NUCLEOSOME_ORGANIZATION                                               | 113  | 1,5   | 0,038 |
| Glucose metabolism                   | GOBP_RIBOSE_PHOSPHATE_BIOSYNTHETIC_PROCESS                                 | 218  | 1,84  | 0,001 |
|                                      | GOBP_ORGANOPHOSPHATE_BIOSYNTHETIC_PROCESS                                  | 536  | 1,56  | 0,022 |
|                                      | GOBP_CARBOHYDRATE_DERIVATIVE_BIOSYNTHETIC_PROCESS                          | 584  | 1,56  | 0,023 |
|                                      | GOBP_ORGANOPHOSPHATE_METABOLIC_PROCESS                                     | 877  | 1,54  | 0,027 |
|                                      | GOBP_CARBOHYDRATE_DERIVATIVE_METABOLIC_PROCESS                             | 950  | 1,53  | 0,031 |
|                                      | GOBP_CELLULAR_CARBOHYDRATE_BIOSYNTHETIC_PROCESS                            | 57   | 1,47  | 0,051 |
| Immune response                      | GOBP_REGULATION_OF_ADAPTIVE_IMMUNE_RESPONSE                                | 175  | -1,47 | 0,064 |
|                                      | GOBP_REGULATION_OF_MYELOID_LEUKOCYTE_DIFFERENTIATION                       | 99   | -1,47 | 0,066 |
|                                      | GOBP_POSITIVE_REGULATION_OF_ALPHA_BETA_T_CELL_ACTIVATION                   | 68   | -1,48 | 0,064 |
|                                      | GOBP_POSITIVE_REGULATION_OF_T_CELL_MEDIATED_IMMUNITY                       | 52   | -1,49 | 0,057 |

|                       |                                                                   |     |       |       |
|-----------------------|-------------------------------------------------------------------|-----|-------|-------|
|                       | GOBP_NEGATIVE_REGULATION_OF_T_CELL_PROLIFERATION                  | 56  | -1,49 | 0,058 |
|                       | GOBP_POSITIVE_REGULATION_OF_CELL_ACTIVATION                       | 360 | -1,49 | 0,06  |
|                       | GOBP_T_CELL_PROLIFERATION                                         | 186 | -1,51 | 0,052 |
|                       | GOBP_REGULATION_OF_LEUKOCYTE_DIFFERENTIATION                      | 269 | -1,52 | 0,049 |
|                       | GOBP_NEGATIVE_REGULATION_OF_CELL_DIFFERENTIATION                  | 520 | -1,52 | 0,048 |
|                       | GOBP_POSITIVE_REGULATION_OF_LEUKOCYTE_PROLIFERATION               | 146 | -1,53 | 0,049 |
|                       | GOBP_REGULATION_OF_LYMPHOCYTE_DIFFERENTIATION                     | 180 | -1,53 | 0,048 |
|                       | GOBP_IMMUNE_RESPONSE_REGULATING_SIGNALING_PATHWAY                 | 394 | -1,54 | 0,045 |
|                       | GOBP_POSITIVE_REGULATION_OF_LYMPHOCYTE_DIFFERENTIATION            | 118 | -1,54 | 0,046 |
|                       | GOBP_NEGATIVE_REGULATION_OF_IMMUNE_SYSTEM_PROCESS                 | 357 | -1,55 | 0,042 |
|                       | GOBP_T_CELL_ACTIVATION                                            | 474 | -1,55 | 0,045 |
|                       | GOBP_REGULATION_OF_ALPHA_BETA_T_CELL_ACTIVATION                   | 103 | -1,57 | 0,037 |
|                       | GOBP_NEGATIVE_REGULATION_OF_ADAPTIVE_IMMUNE_RESPONSE              | 53  | -1,57 | 0,039 |
|                       | GOBP_REGULATION_OF_ANTIGEN_RECEPTOR_MEDIATED_SIGNALING_PATHWAY    | 62  | -1,6  | 0,033 |
|                       | GOBP_REGULATION_OF_T_CELL_ACTIVATION                              | 325 | -1,6  | 0,032 |
|                       | GOBP_NEGATIVE_REGULATION_OF_LEUKOCYTE_MEDIATED_IMMUNITY           | 58  | -1,61 | 0,03  |
|                       | GOBP_NEGATIVE_REGULATION_OF_IMMUNE_RESPONSE                       | 153 | -1,63 | 0,027 |
|                       | GOBP_T_CELL_MEDIATED_IMMUNITY                                     | 100 | -1,63 | 0,028 |
|                       | GOBP_ALPHA_BETA_T_CELL_ACTIVATION                                 | 156 | -1,65 | 0,025 |
|                       | GOBP_T_CELL_DIFFERENTIATION                                       | 265 | -1,67 | 0,022 |
|                       | GOBP_REGULATION_OF_ALPHA_BETA_T_CELL_DIFFERENTIATION              | 67  | -1,69 | 0,02  |
|                       | GOBP_NEGATIVE_REGULATION_OF_IMMUNE_EFFECTOR_PROCESS               | 98  | -1,75 | 0,013 |
|                       | GOBP_MYELOID_LEUKOCYTE_DIFFERENTIATION                            | 182 | -1,79 | 0,01  |
|                       | GOBP_REGULATION_OF_CD4_POSITIVE_ALPHA_BETA_T_CELL_ACTIVATION      | 71  | -1,84 | 0,006 |
|                       | GOBP_REGULATION_OF_CD4_POSITIVE_ALPHA_BETA_T_CELL_DIFFERENTIATION | 52  | -1,85 | 0,006 |
|                       | GOBP_T_CELL_ACTIVATION_INVOLVED_IN_IMMUNE_RESPONSE                | 93  | -1,85 | 0,006 |
|                       | GOBP_ALPHA_BETA_T_CELL_DIFFERENTIATION                            | 107 | -1,92 | 0,003 |
|                       | GOBP_CD4_POSITIVE_ALPHA_BETA_T_CELL_ACTIVATION                    | 104 | -1,94 | 0,003 |
|                       | GOBP_T_CELL_DIFFERENTIATION_IN_THYMUS                             | 74  | -1,94 | 0,003 |
|                       | GOBP_T_CELL_DIFFERENTIATION_INVOLVED_IN_IMMUNE_RESPONSE           | 69  | -1,94 | 0,003 |
|                       | GOBP_CD4_POSITIVE_ALPHA_BETA_T_CELL_DIFFERENTIATION               | 81  | -2,03 | 0,001 |
| Inflammation          | GOBP_REGULATION_OF_INFLAMMATORY_RESPONSE                          | 286 | -1,52 | 0,051 |
| MAPK signaling        | GOBP_MAPK_CASCADE                                                 | 607 | -1,5  | 0,055 |
|                       | GOBP_POSITIVE_REGULATION_OF_MAPK_CASCADE                          | 366 | -1,57 | 0,037 |
|                       | GOBP_P38MAPK_CASCADE                                              | 50  | -1,71 | 0,019 |
| Metabolite transport  | GOBP_PROTON_TRANSMEMBRANE_TRANSPORT                               | 131 | 1,85  | 0,001 |
|                       | GOMF_PROTON_TRANSMEMBRANE_TRANSPORTER_ACTIVITY                    | 106 | 1,77  | 0,002 |
|                       | GOMF_PRIMARY_ACTIVE_TRANSMEMBRANE_TRANSPORTER_ACTIVITY            | 148 | 1,63  | 0,012 |
|                       | GOBP_CARBOHYDRATE_DERIVATIVE_TRANSPORT                            | 66  | 1,62  | 0,013 |
| NF-kappaB pathway     | GOBP_NIK_NF_KAPPAB_SIGNALING                                      | 113 | -1,65 | 0,025 |
|                       | GOBP_POSITIVE_REGULATION_OF_I_KAPPAB_KINASE_NF_KAPPAB_SIGNALING   | 175 | -1,8  | 0,009 |
|                       | GOBP_I_KAPPAB_KINASE_NF_KAPPAB_SIGNALING                          | 259 | -1,9  | 0,003 |
| Notch signaling       | GOBP_REGULATION_OF_NOTCH_SIGNALING_PATHWAY                        | 76  | -1,68 | 0,021 |
|                       | GOBP_NOTCH_SIGNALING_PATHWAY                                      | 137 | -1,68 | 0,022 |
| Nucleotide metabolism | GOBP_ATP_BIOSYNTHETIC_PROCESS                                     | 101 | 2,09  | 0     |
|                       | GOBP_DNA_METABOLIC_PROCESS                                        | 967 | 2,03  | 0     |
|                       | GOBP_NUCLEOSIDE_PHOSPHATE_BIOSYNTHETIC_PROCESS                    | 266 | 1,94  | 0     |



|                                    |                                                                      |     |      |       |
|------------------------------------|----------------------------------------------------------------------|-----|------|-------|
|                                    | GOBP_PURINE_CONTAINING_COMPOUND_BIOSYNTHETIC_PROCESS                 | 219 | 1,93 | 0     |
|                                    | GOBP_NUCLEOSIDE_TRIPHOSPHATE_BIOSYNTHETIC_PROCESS                    | 128 | 1,92 | 0     |
|                                    | GOBP_NUCLEOBASE_CONTAINING_SMALL_MOLECULE_METABOLIC_PROCESS          | 590 | 1,9  | 0     |
|                                    | GOBP_NUCLEOSIDE_METABOLIC_PROCESS                                    | 53  | 1,85 | 0,001 |
|                                    | GOBP_PYRIDINE_CONTAINING_COMPOUND_METABOLIC_PROCESS                  | 71  | 1,81 | 0,001 |
|                                    | GOBP_DNA_BIOSYNTHETIC_PROCESS                                        | 180 | 1,8  | 0,002 |
|                                    | GOBP_NUCLEOSIDE_PHOSPHATE_CATABOLIC_PROCESS                          | 78  | 1,79 | 0,002 |
|                                    | GOBP_REGULATION_OF_DNA_METABOLIC_PROCESS                             | 502 | 1,75 | 0,003 |
|                                    | GOBP_DICARBOXYLIC_ACID_METABOLIC_PROCESS                             | 79  | 1,75 | 0,003 |
|                                    | GOBP_PYRIMIDINE_CONTAINING_COMPOUND_METABOLIC_PROCESS                | 81  | 1,71 | 0,005 |
|                                    | GOBP_NUCLEOSIDE_BISPHOSPHATE_METABOLIC_PROCESS                       | 107 | 1,68 | 0,008 |
|                                    | GOBP_NUCLEOSIDE_MONOPHOSPHATE_METABOLIC_PROCESS                      | 72  | 1,67 | 0,008 |
|                                    | GOBP_PURINE_CONTAINING_COMPOUND_METABOLIC_PROCESS                    | 429 | 1,67 | 0,008 |
|                                    | GOBP_ATP_METABOLIC_PROCESS                                           | 193 | 1,61 | 0,014 |
|                                    | GOBP_POSITIVE_REGULATION_OF_DNA_METABOLIC_PROCESS                    | 282 | 1,6  | 0,015 |
|                                    | GOBP_NUCLEOSIDE_TRIPHOSPHATE_METABOLIC_PROCESS                       | 240 | 1,6  | 0,016 |
|                                    | GOBP_NUCLEOSIDE_BISPHOSPHATE_BIOSYNTHETIC_PROCESS                    | 55  | 1,57 | 0,021 |
|                                    | GOBP_NEGATIVE_REGULATION_OF_DNA_METABOLIC_PROCESS                    | 127 | 1,54 | 0,028 |
| Organelle organization             | GOBP_ORGANELLE_FISSION                                               | 474 | 2,59 | 0     |
|                                    | GOCC_INNER_MITOCHONDRIAL_MEMBRANE_PROTEIN_COMPLEX                    | 150 | 2,22 | 0     |
|                                    | GOCC_MITOCHONDRIAL_PROTEIN_CONTAINING_COMPLEX                        | 284 | 2,19 | 0     |
|                                    | GOBP_NEGATIVE_REGULATION_OF_ORGANELLE_ORGANIZATION                   | 324 | 2,03 | 0     |
|                                    | GOCC_ORGANELLE_INNER_MEMBRANE                                        | 510 | 1,97 | 0     |
|                                    | GOCC_MITOCHONDRIAL_MATRIX                                            | 459 | 1,96 | 0     |
|                                    | HP_ABNORMALITY_OF_THE_MITOCHONDRION                                  | 181 | 1,93 | 0     |
|                                    | GOBP_NON_MEMBRANE_BOUNDED_ORGANELLE_ASSEMBLY                         | 356 | 1,92 | 0     |
|                                    | GOBP_MITOCHONDRIAL_TRANSLATION                                       | 131 | 1,86 | 0,001 |
|                                    | HP_DECREASED_ACTIVITY_OF_MITOCHONDRIAL_COMPLEX_I                     | 53  | 1,77 | 0,002 |
|                                    | GOCC_MITOCHONDRIAL_ENVELOPE                                          | 731 | 1,75 | 0,003 |
|                                    | GOCC_INTRINSIC_COMPONENT_OF_MITOCHONDRIAL_INNER_MEMBRANE             | 58  | 1,74 | 0,003 |
|                                    | GOCC_MITOCHONDRIAL_LARGE_RIBOSOMAL_SUBUNIT                           | 56  | 1,71 | 0,005 |
|                                    | GOBP_MITOCHONDRIAL_GENE_EXPRESSION                                   | 163 | 1,66 | 0,009 |
|                                    | GOCC_ORGANELLE_ENVELOPE_LUMEN                                        | 87  | 1,66 | 0,01  |
|                                    | GOBP_ESTABLISHMENT_OF_ORGANELLE_LOCALIZATION                         | 395 | 1,6  | 0,016 |
|                                    | GOCC_INTRINSIC_COMPONENT_OF_MITOCHONDRIAL_MEMBRANE                   | 89  | 1,56 | 0,023 |
|                                    | GOBP_MITOCHONDRIAL_TRANSMEMBRANE_TRANSPORT                           | 83  | 1,54 | 0,027 |
| Oxidative phosphorylation (OXPHOS) | GOBP_OXIDATIVE_PHOSPHORYLATION                                       | 138 | 2,39 | 0     |
|                                    | GOBP_ATP_SYNTHESIS_COUPLED_ELECTRON_TRANSPORT                        | 94  | 2,37 | 0     |
|                                    | GOBP_AEROBIC_RESPIRATION                                             | 182 | 2,36 | 0     |
|                                    | GOCC_RESPIRASOME                                                     | 93  | 2,29 | 0     |
|                                    | GOMF_ELECTRON_TRANSFER_ACTIVITY                                      | 111 | 2,26 | 0     |
|                                    | GOMF_OXIDOREDUCTION_DRIVEN_ACTIVE_TRANSMEMBRANE_TRANSPORTER_ACTIVITY | 66  | 2,18 | 0     |
|                                    | GOCC_OXIDOREDUCTASE_COMPLEX                                          | 119 | 2,15 | 0     |
|                                    | GOBP_RESPIRATORY_ELECTRON_TRANSPORT_CHAIN                            | 113 | 2,13 | 0     |
|                                    | GOBP_CELLULAR_RESPIRATION                                            | 222 | 2,09 | 0     |
|                                    | HP_ABNORMAL_ACTIVITY_OF_MITOCHONDRIAL_RESPIRATORY_CHAIN              | 96  | 2,05 | 0     |
|                                    | GOBP_ELECTRON_TRANSPORT_CHAIN                                        | 160 | 2,04 | 0     |

|                                                |                                                                               |       |       |       |
|------------------------------------------------|-------------------------------------------------------------------------------|-------|-------|-------|
|                                                | GOBP_MITOCHONDRIAL_RESPIRATORY_CHAIN_COMPLEX_ASSEMBLY                         | 98    | 1,95  | 0     |
|                                                | GOBP_ENERGY_DERIVATION_BY_OXIDATION_OF_ORGANIC_COMPOUNDS                      | 288   | 1,93  | 0     |
| Regulation of cell death                       | GOBP_LYMPHOCYTE_APOPTOTIC_PROCESS                                             | 71    | -1,48 | 0,063 |
|                                                | GOBP_EPITHELIAL_CELL_APOPTOTIC_PROCESS                                        | 102   | -1,52 | 0,048 |
|                                                | GOBP_NEGATIVE_REGULATION_OF_CELL_POPULATION_PROLIFERATION                     | 579   | -1,54 | 0,047 |
|                                                | GOBP_EXTRINSIC_APOPTOTIC_SIGNALING_PATHWAY_VIA_DEATH_DOMAIN_RECEPTORS         | 73    | -1,55 | 0,045 |
|                                                | GOBP_EXTRINSIC_APOPTOTIC_SIGNALING_PATHWAY                                    | 195   | -1,56 | 0,039 |
|                                                | GOBP_REGULATION_OF_EXTENT_OF_CELL_GROWTH                                      | 92    | -1,58 | 0,036 |
|                                                | GOBP_REGULATION_OF_EPITHELIAL_CELL_APOPTOTIC_PROCESS                          | 77    | -1,66 | 0,023 |
|                                                | GOBP_REGULATION_OF_EXTRINSIC_APOPTOTIC_SIGNALING_PATHWAY                      | 130   | -1,7  | 0,019 |
|                                                | GOBP_REGULATION_OF_LYMPHOCYTE_APOPTOTIC_PROCESS                               | 54    | -1,7  | 0,02  |
|                                                | GOBP_LEUKOCYTE_APOPTOTIC_PROCESS                                              | 104   | -1,74 | 0,015 |
|                                                | GOBP_NEGATIVE_REGULATION_OF_EXTRINSIC_APOPTOTIC_SIGNALING_PATHWAY             | 85    | -1,78 | 0,01  |
|                                                | GOBP_NECROTIC_CELL_DEATH                                                      | 59    | -1,78 | 0,011 |
|                                                | GOBP_JNK_CASCADE                                                              | 152   | -1,83 | 0,007 |
|                                                | GOBP_POSITIVE_REGULATION_OF_JNK_CASCADE                                       | 82    | -1,87 | 0,004 |
|                                                | GOBP_REGULATION_OF_JNK_CASCADE                                                | 122   | -1,95 | 0,002 |
| GOBP_REGULATION_OF_LEUKOCYTE_APOPTOTIC_PROCESS | 81                                                                            | -1,95 | 0,003 |       |
| Regulation of cytoskeleton                     | GOBP_MICROTUBULE_CYTOSKELETON_ORGANIZATION_INVOLVED_IN_MITOSIS                | 154   | 2,61  | 0     |
|                                                | GOMF_MICROTUBULE_MOTOR_ACTIVITY                                               | 61    | 2,08  | 0     |
|                                                | GOBP_MICROTUBULE_ORGANIZING_CENTER_ORGANIZATION                               | 144   | 2,01  | 0     |
|                                                | GOBP_MICROTUBULE_CYTOSKELETON_ORGANIZATION                                    | 569   | 1,96  | 0     |
|                                                | GOMF_MICROTUBULE_BINDING                                                      | 248   | 1,92  | 0     |
|                                                | GOCC_MICROTUBULE                                                              | 408   | 1,91  | 0     |
|                                                | GOCC_MICROTUBULE_ORGANIZING_CENTER                                            | 754   | 1,89  | 0     |
|                                                | GOMF_CYTOSKELETAL_MOTOR_ACTIVITY                                              | 93    | 1,84  | 0,001 |
|                                                | GOCC_POLYMERIC_CYTOSKELETAL_FIBER                                             | 557   | 1,77  | 0,002 |
|                                                | GOBP_MICROTUBULE_BASED_PROCESS                                                | 801   | 1,72  | 0,005 |
|                                                | GOCC_MICROTUBULE_ASSOCIATED_COMPLEX                                           | 141   | 1,71  | 0,005 |
|                                                | GOMF_TUBULIN_BINDING                                                          | 338   | 1,68  | 0,007 |
|                                                | GOBP_REGULATION_OF_MICROTUBULE_BASED_PROCESS                                  | 215   | 1,56  | 0,022 |
|                                                | GOCC_CYTOPLASMIC_MICROTUBULE                                                  | 83    | 1,55  | 0,025 |
|                                                | GOBP_MICROTUBULE_POLYMERIZATION_OR_DEPOLYMERIZATION                           | 113   | 1,55  | 0,026 |
|                                                | GOBP_REGULATION_OF_MICROTUBULE_CYTOSKELETON_ORGANIZATION                      | 142   | 1,51  | 0,035 |
| GOMF_MYOSIN_BINDING                            | 60                                                                            | 1,51  | 0,036 |       |
| Response to stress                             | GOBP_MULTICELLULAR_ORGANISMAL_RESPONSE_TO_STRESS                              | 55    | -1,52 | 0,049 |
|                                                | GOBP_REGULATION_OF_RESPONSE_TO_WOUNDING                                       | 126   | -1,6  | 0,032 |
|                                                | GOBP_REGULATION_OF_WOUND_HEALING                                              | 98    | -1,61 | 0,031 |
|                                                | GOBP_STRESS_ACTIVATED_PROTEIN_KINASE_SIGNALING_CASCADE                        | 218   | -1,7  | 0,019 |
|                                                | GOBP_REGULATION_OF_STRESS_ACTIVATED_PROTEIN_KINASE_SIGNALING_CASCADE          | 174   | -1,85 | 0,006 |
|                                                | GOBP_POSITIVE_REGULATION_OF_STRESS_ACTIVATED_PROTEIN_KINASE_SIGNALING_CASCADE | 114   | -1,93 | 0,003 |
| Ribosome structure                             | GOMF_STRUCTURAL_CONSTITUENT_OF_RIBOSOME                                       | 162   | 2,13  | 0     |
|                                                | GOCC_RIBOSOMAL_SUBUNIT                                                        | 183   | 2,09  | 0     |
|                                                | GOCC_CYTOSOLIC_RIBOSOME                                                       | 100   | 2,04  | 0     |
|                                                | GOCC_RIBOSOME                                                                 | 214   | 1,96  | 0     |
|                                                | GOCC_SMALL_RIBOSOMAL_SUBUNIT                                                  | 75    | 1,93  | 0     |

|                              |                                                         |     |       |       |
|------------------------------|---------------------------------------------------------|-----|-------|-------|
|                              | GOCC_LARGE_RIBOSOMAL_SUBUNIT                            | 112 | 1,9   | 0     |
|                              | GOCC_CYTOSOLIC_LARGE_RIBOSOMAL_SUBUNIT                  | 56  | 1,84  | 0,001 |
|                              | GOCC_ORGANELLAR_RIBOSOME                                | 89  | 1,82  | 0,001 |
| T cell receptor signaling    | GOBP_T_CELL_RECEPTOR_SIGNALING_PATHWAY                  | 130 | -1,63 | 0,028 |
| TNF Signaling                | GOBP_TUMOR_NECROSIS_FACTOR_MEDIATED_SIGNALING_PATHWAY   | 93  | -1,93 | 0,003 |
|                              | GOBP_RESPONSE_TO_TUMOR_NECROSIS_FACTOR                  | 203 | -1,97 | 0,002 |
| Toll-like Receptor Signaling | GOBP_REGULATION_OF_TOLL_LIKE_RECEPTOR_SIGNALING_PATHWAY | 62  | -1,97 | 0,002 |
|                              | GOBP_TOLL_LIKE_RECEPTOR_SIGNALING_PATHWAY               | 105 | -2,05 | 0,001 |
| Wnt signaling                | GOBP_POSITIVE_REGULATION_OF_WNT_SIGNALING_PATHWAY       | 112 | -1,52 | 0,049 |
|                              | GOBP_NON_CANONICAL_WNT_SIGNALING_PATHWAY                | 56  | -1,52 | 0,049 |

6

| ONCOGENIC GENE SETS (C6) |                      |      |       |           |
|--------------------------|----------------------|------|-------|-----------|
| Biological process       | GeneSet              | SIZE | NES   | FDR q-val |
| Cell cycle regulation    | RB_P107_DN.V1_UP     | 120  | 2,84  | 0         |
|                          | RB_DN.V1_UP          | 107  | 2,06  | 0         |
|                          | E2F1_UP.V1_UP        | 171  | 2,06  | 0         |
|                          | E2F3_UP.V1_UP        | 164  | 1,83  | 0         |
|                          | RB_P130_DN.V1_UP     | 99   | 1,65  | 0,003     |
| Cytokines                | IL21_UP.V1_DN        | 109  | -1,57 | 0,013     |
| Epigenetic regulation    | PRC2_EZH2_UP.V1_DN   | 155  | 2,33  | 0         |
|                          | PRC2_EED_DN.V1_DN    | 174  | 2,13  | 0         |
| KRAS pathway             | KRAS.DF.V1_DN        | 150  | -1,6  | 0,013     |
|                          | KRAS.BREAST_UP.V1_UP | 85   | -1,61 | 0,015     |
| mTOR Signaling           | MTOR_UP.V1_UP        | 138  | 2,06  | 0         |
| TGF-Beta signaling       | TGFB_UP.V1_UP        | 158  | -1,99 | 0         |
| Wnt signaling            | WNT_UP.V1_DN         | 132  | -1,5  | 0,021     |

7  
8  
9  
10  
11  
12  
13  
14  
15  
16  
17  
18  
19  
20  
21  
22
